# Supplementary material
Source: PubMed Central journal article supplement (PMC1755661)
Supplement: annrheumd_ard.2005.037903_2.pdf [file annrheumd_ard.2005.037903_2.pdf]

Supplementary table 1. Percentile values of pain on visual analogue scale (range 0-100) in the general population

| Age          | Centile          |                  |                  |                  |                  |
|--------------|------------------|------------------|------------------|------------------|------------------|
|              | 50 <sup>th</sup> | 75 <sup>th</sup> | 90 <sup>th</sup> | 95 <sup>th</sup> | 99 <sup>th</sup> |
| <b>Women</b> |                  |                  |                  |                  |                  |
| 30-35        | 0                | 7.5              | 17.5             | 34               | 63               |
| 36-40        | 4                | 14.5             | 31               | 49               | 84               |
| 41-45        | 3                | 13               | 30               | 63               | 81               |
| 46-50        | 5                | 17               | 47               | 68               | 81               |
| 51-55        | 7                | 28               | 59               | 71               | 87               |
| 56-60        | 14               | 44               | 67               | 81               | 100              |
| 61-65        | 13               | 37.5             | 61               | 74               | 88               |
| 66-70        | 20               | 42               | 64               | 75               | 100              |
| 71-75        | 24               | 44               | 69               | 77               | 100              |
| 76-80        | 38               | 63               | 75               | 87               | 100              |
| >80          | 46               | 65               | 86               | 94               | 100              |
| Total        | 9.5              | 31.5             | 61               | 72               | 94               |
| <b>Men</b>   |                  |                  |                  |                  |                  |
| 30-35        | 0                | 11               | 33               | 75               | 100              |
| 36-40        | 3.5              | 16               | 49               | 63               | 69               |
| 41-45        | 7                | 20               | 38               | 50               | 68               |
| 46-50        | 4.5              | 19.5             | 33               | 55               | 91               |
| 51-55        | 10               | 28               | 46               | 62               | 79               |
| 56-60        | 12               | 36               | 50               | 63               | 80               |
| 61-65        | 18               | 39.5             | 61               | 65               | 70               |
| 66-70        | 14               | 33               | 55               | 61               | 95               |
| 71-75        | 25               | 49               | 68               | 73               | 100              |
| 76-80        | 30               | 59               | 82               | 84               | 84               |
| >80          | 46               | 67               | 95               | 95               | 95               |
| Total        | 10               | 28               | 54               | 67               | 95               |

Table W2 Centile values of global health on visual analogue scale (range 0-100) in the general population.

| Age          | Centile          |                  |                  |                  |                  |
|--------------|------------------|------------------|------------------|------------------|------------------|
|              | 50 <sup>th</sup> | 75 <sup>th</sup> | 90 <sup>th</sup> | 95 <sup>th</sup> | 99 <sup>th</sup> |
| <b>Women</b> |                  |                  |                  |                  |                  |
| 30-35        | 4                | 19               | 31.5             | 42               | 83               |
| 36-40        | 6                | 16               | 31               | 39               | 58               |
| 41-45        | 8                | 19               | 41               | 47               | 76               |
| 46-50        | 9                | 24               | 44               | 57               | 71               |
| 51-55        | 11.5             | 27               | 57               | 67               | 75               |
| 56-60        | 19               | 44               | 58               | 69               | 100              |
| 61-65        | 18               | 38               | 44               | 56               | 86               |
| 66-70        | 21               | 46               | 62               | 69               | 100              |
| 71-75        | 31               | 45               | 59               | 66               | 100              |
| 76-80        | 42               | 50               | 62               | 79               | 94               |
| >80          | 47               | 63               | 73               | 79               | 100              |
| <b>Total</b> | <b>15</b>        | <b>37</b>        | <b>54</b>        | <b>66</b>        | <b>86</b>        |
| <b>Men</b>   |                  |                  |                  |                  |                  |
| 30-35        | 5                | 19               | 45               | 48               | 48               |
| 36-40        | 6.5              | 22               | 43               | 60               | 69               |
| 41-45        | 9                | 21               | 30               | 36               | 68               |
| 46-50        | 11.5             | 25.5             | 42               | 55               | 92               |
| 51-55        | 10               | 25               | 41               | 53               | 72               |
| 56-60        | 16               | 40               | 45               | 50               | 58               |
| 61-65        | 23.5             | 43               | 60               | 63               | 66               |
| 66-70        | 20               | 46               | 51               | 63               | 93               |
| 71-75        | 36.5             | 58               | 76               | 87               | 94               |
| 76-80        | 30               | 43               | 76               | 79               | 79               |
| >80          | 51               | 62               | 100              | 100              | 100              |
| <b>Total</b> | <b>13</b>        | <b>30</b>        | <b>50</b>        | <b>63</b>        | <b>92</b>        |

Table 3. Centile values of HAQ-DI (range 0-3) in the general population reproduced from (6)

| Age          | Centile          |                  |                  |                  |                  |
|--------------|------------------|------------------|------------------|------------------|------------------|
|              | 50 <sup>th</sup> | 75 <sup>th</sup> | 90 <sup>th</sup> | 95 <sup>th</sup> | 99 <sup>th</sup> |
| <u>Women</u> |                  |                  |                  |                  |                  |
| 30-35        | 0.00             | 0.00             | 0.00             | 0.19             | 0.75             |
| 36-40        | 0.00             | 0.00             | 0.25             | 0.50             | 1.50             |
| 41-45        | 0.00             | 0.00             | 0.13             | 0.25             | 1.00             |
| 46-50        | 0.00             | 0.00             | 0.25             | 0.63             | 1.00             |
| 51-55        | 0.00             | 0.00             | 0.63             | 1.25             | 1.75             |
| 56-60        | 0.00             | 0.25             | 0.88             | 1.38             | 1.88             |
| 61-65        | 0.00             | 0.25             | 0.75             | 1.13             | 1.50             |
| 66-70        | 0.00             | 0.38             | 1.00             | 1.75             | 3.00             |
| 71-75        | 0.00             | 0.38             | 0.88             | 1.50             | 2.38             |
| 76-80        | 0.63             | 1.13             | 1.88             | 2.13             | 2.63             |
| >80          | 1.31             | 2.50             | 2.88             | 3.00             | 3.00             |
| Total        | 0                | .25              | .875             | 1.75             | 2.875            |

Men

|       |      |       |      |       |      |
|-------|------|-------|------|-------|------|
| 30-35 | 0.00 | 0.00  | 0.00 | 0.75  | 1.13 |
| 36-40 | 0.00 | 0.00  | 0.38 | 0.38  | 1.75 |
| 41-45 | 0.00 | 0.00  | 0.25 | 0.50  | 1.25 |
| 46-50 | 0.00 | 0.00  | 0.38 | 1.00  | 1.88 |
| 51-55 | 0.00 | 0.13  | 0.63 | 0.75  | 1.25 |
| 56-60 | 0.00 | 0.06  | 0.50 | 0.75  | 0.75 |
| 61-65 | 0.00 | 0.25  | 0.69 | 0.88  | 0.88 |
| 66-70 | 0.00 | 0.00  | 0.88 | 1.13  | 1.50 |
| 71-75 | 0.06 | 0.63  | 1.56 | 1.63  | 3.00 |
| 76-80 | 0.44 | 0.88  | 2.00 | 2.00  | 2.00 |
| >80   | 1.00 | 2.00  | 2.44 | 2.75  | 2.75 |
| Total | 0    | 0.125 | 0.75 | 1.125 | 2.00 |
